# Supplementary material
Source: PubMed Central journal article supplement (PMC6349130)
Supplement: supp_RA118.005408_140177_1_supp_242089_pjz244.pdf [file supp_RA118.005408_140177_1_supp_242089_pjz244.pdf]

Phenamacril is a reversible and non-competitive inhibitor of *Fusarium* class I myosin

**Rasmus Dam Wollenberg<sup>‡1</sup>, Manuel H. Taft<sup>§1</sup>, Sven Giese<sup>§</sup>, Claudia Thiel<sup>Ψ</sup>, Zoltán Balázs<sup>‡</sup>,  
Henriette Giese<sup>‡</sup>, Dietmar J. Manstein<sup>§Ψ\*</sup> and Teis Esben Sondergaard<sup>‡\*</sup>**

From the <sup>‡</sup>Department of Chemistry and Bioscience, Aalborg University, DK-9220 Aalborg, Denmark;

<sup>§</sup>Institute for Biophysical Chemistry, OE4350, Hannover Medical School, 30623 Hannover, Germany;

<sup>Ψ</sup>Division of Structural Biochemistry, OE8830, Hannover Medical School, 30623 Hannover, Germany

Running title: *Inhibition of Fusarium class I myosin by phenamacril*

<sup>1</sup>Both authors contributed equally to this work.

\*To whom correspondence should be addressed: Teis Esben Sondergaard, Department of Chemistry and Bioscience, Aalborg University, DK-9220 Aalborg, Denmark; E-mail: [tes@bio.aau.dk](mailto:tes@bio.aau.dk); Tel. +45 9940 8524; Dietmar J. Manstein, Institute for Biophysical Chemistry, OE4350, Hannover Medical School, 30623 Hannover, Germany; E-mail [manstein.dietmar@mh-hannover.de](mailto:manstein.dietmar@mh-hannover.de); Tel. +49 511 532 3700

List of supplementary information: Table S1, Figure S1, Figure S2, Figure S3, Figure S4, Figure S5

**Table S1.** Oligo DNA primers used to amplify the regions encoding *Fusarium* calmodulin and myosin class I motor domain constructs. Fg: *Fusarium graminearum*, Fa: *F. avenaceum*, Fs: *F. solani*, CaM: calmodulin, LIC: ligase independent cloning.

| Primer ID | Sequence 5'-3'                                                    | Target locus          | Protein               |
|-----------|-------------------------------------------------------------------|-----------------------|-----------------------|
| P1152     | TTTCTCGAGATGGGCCGACTCACTTACTGAAG                                  | FGSG_01891            | FgCaM                 |
| P1153     | GTTTGCTAGCTTATTTTTGCATCATAAGCTGG                                  | FGSG_01891            | FgCaM                 |
| P1125     | GAAGGATCCATGGATTACAAGGATGACGACG<br>ATAAGATGGGAATATCGAGACGCCCGAA   | FGSG_01409            | FgMyo1                |
| P1126     | CCCAAGCTTTTAGTGGTGGTGGTGGTGGTGTG<br>AACCTGATCGCATGTGCTCCAGAGCGAA  | FGSG_01409            | FgMyo1                |
| P1125     | GAAGGATCCATGGATTACAAGGATGACGACG<br>ATAAGATGGGAATATCGAGACGCCCGAA   | FGSG_01409            | FgMyo1 <sub>IQ2</sub> |
| P1127     | CCCAAGCTTTTAGTGGTGGTGGTGGTGGTGTG<br>AACCTGAGTCACGAAGCTGGAGAAATTC  | FGSG_01409            | FgMyo1 <sub>IQ2</sub> |
| P1130     | GAAGGATCCATGGATTACAAGGATGACGACGA<br>TAAGATGGGAATATCGAGACGCCCTAA   | FAVG1_11042           | FaMyo1 <sub>IQ2</sub> |
| P1132     | CCCAAGCTTTTAGTGGTGGTGGTGGTGGTGTGA<br>ACCTGAGTCCCGGAGTTGCAGATACT   | FAVG1_11042           | FaMyo1 <sub>IQ2</sub> |
| P1135     | GAAGGATCCATGGATTACAAGGATGACGACG<br>ATAAGATGGGAATATCAAGACGTCCCAA   | NECHADRAFT_10<br>3022 | FsMyo1 <sub>IQ2</sub> |
| P1137     | CCCAAGCTTTTAGTGGTGGTGGTGGTGGTGTG<br>AACCTGAATCTCGAAGCTGCAAGTACTCG | NECHADRAFT_10<br>3022 | FsMyo1 <sub>IQ2</sub> |
| P1345     | AAAACCTCTATTTTCAGGCCGACTCACTTACT<br>GAAGAG                        | FGSG_01891            | FgCaM <sub>LIC</sub>  |
| P1346     | TATCCACCTTACTGTTATTTTTGCATCATAAG<br>CTGG                          | FGSG_01891            | FgCaM <sub>LIC</sub>  |

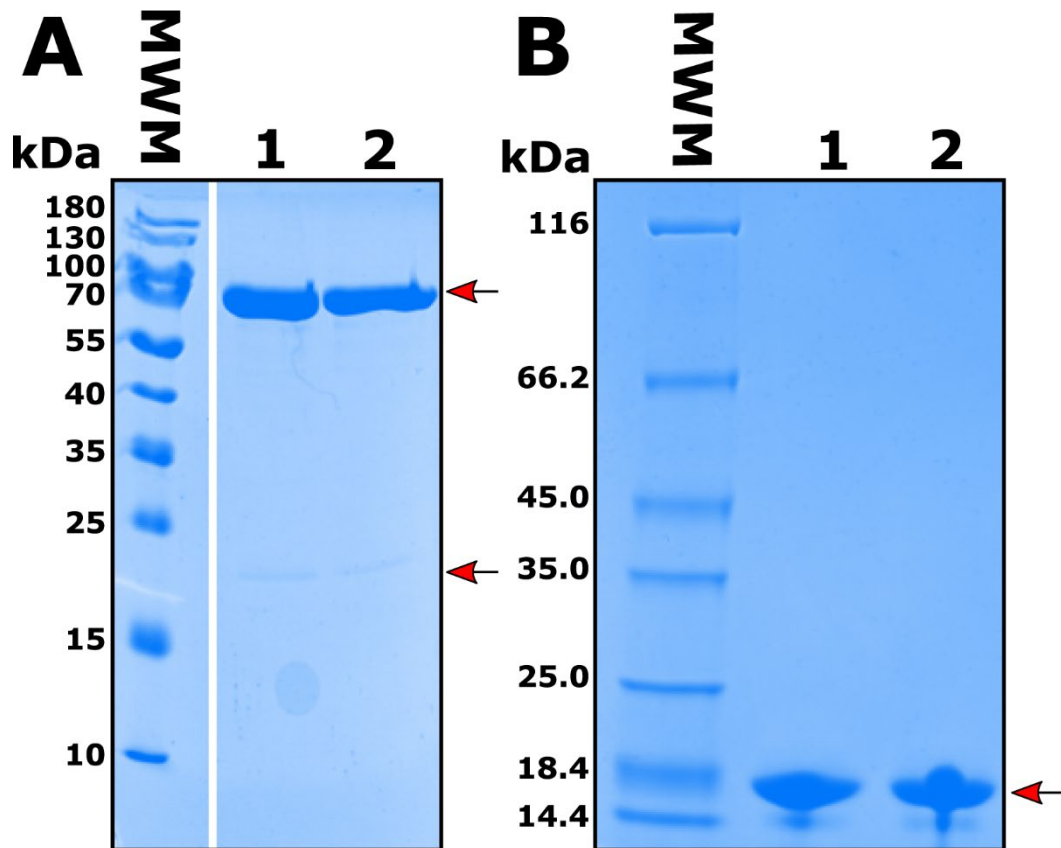

**Figure S1.** Coomassie-Brilliant Blue stained polyacrylamide gels showing two representative fractions resulting from the size-exclusion chromatographic purification of (A) FgMyo1<sub>IQ2</sub> co-expressed with calmodulin from *F. graminearum* PH-1 in *Sf9* insect cells. White line indicates removed lanes. (B) *E. coli* BL21(DE3) produced calmodulin from *F. graminearum* PH-1 (FgCaM). Red arrows serve to highlight the presence of the relevant protein-bands.

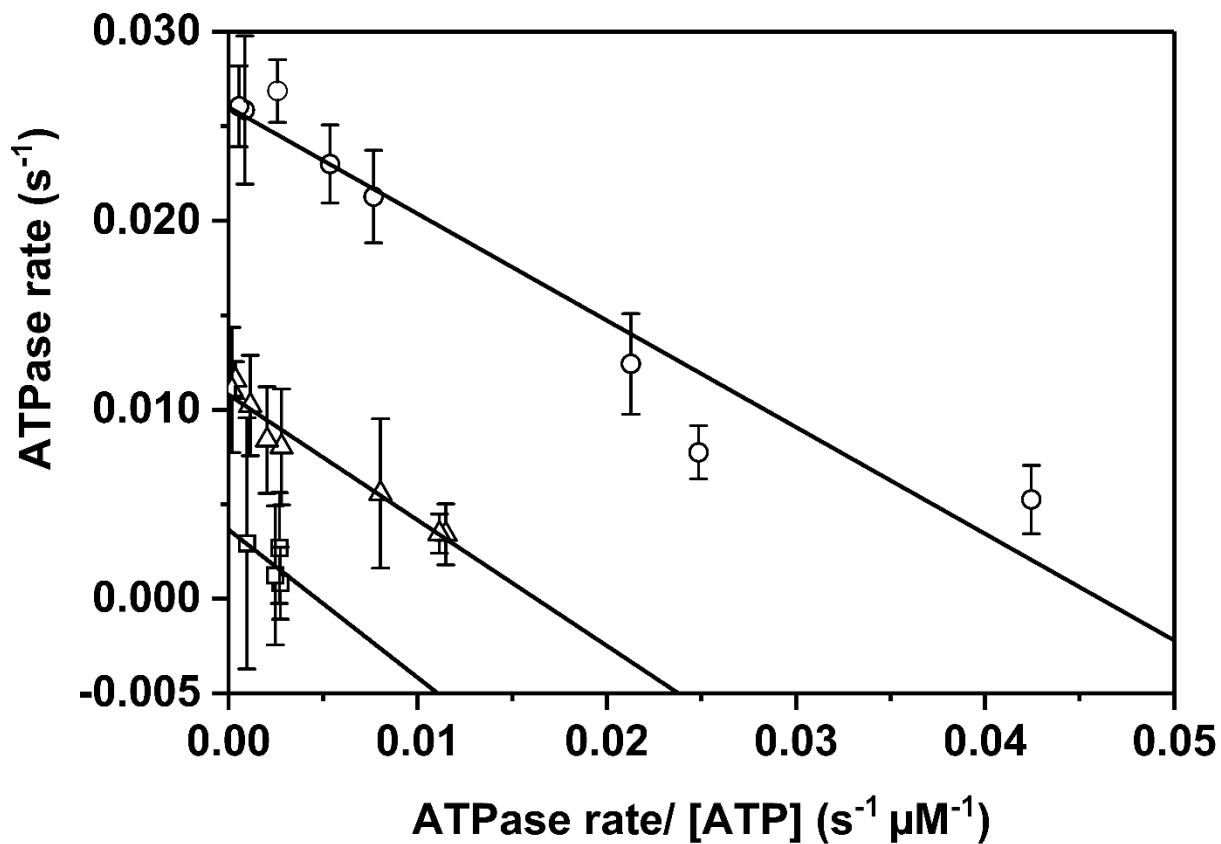

**Figure S2.** Eadie-Hofstee plots of Phenamacril inhibition of basal ATP turnover in the presence of Ca<sup>2+</sup> by FgMyo1. A least-squares regression analysis was used to determine the Eadie-Hofstee linear correlations. Measurements were performed in the presence of 0 (○), 0.6 (Δ) and 10 μM (□) Phenamacril. Error bars represent standard deviations around the mean (n = 3).

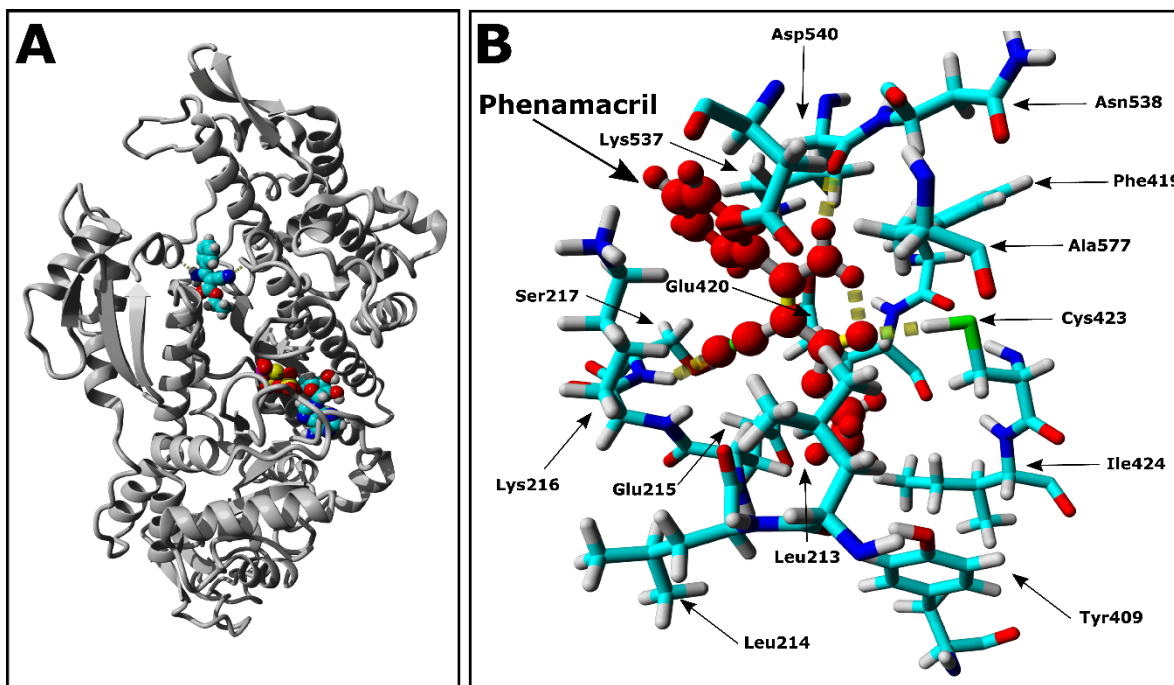

**Figure S3.** Phenamacril docks into the actin-binding groove of the *F. graminearum* class I myosin motor domain (A) Position of Phenamacril within the docked homology model of the *F. graminearum* class I myosin motor domain. For reference, the position of the nucleotide binding-pocket is indicated by the position of ADP-vanadate (B) Close-up view, highlighting the protein-ligand interactions between Phenamacril (shown as red ball-and-stick model) and amino acid residues from the motor domain (stick-model). Hydrogen-bonds are shown as dotted yellow lines.

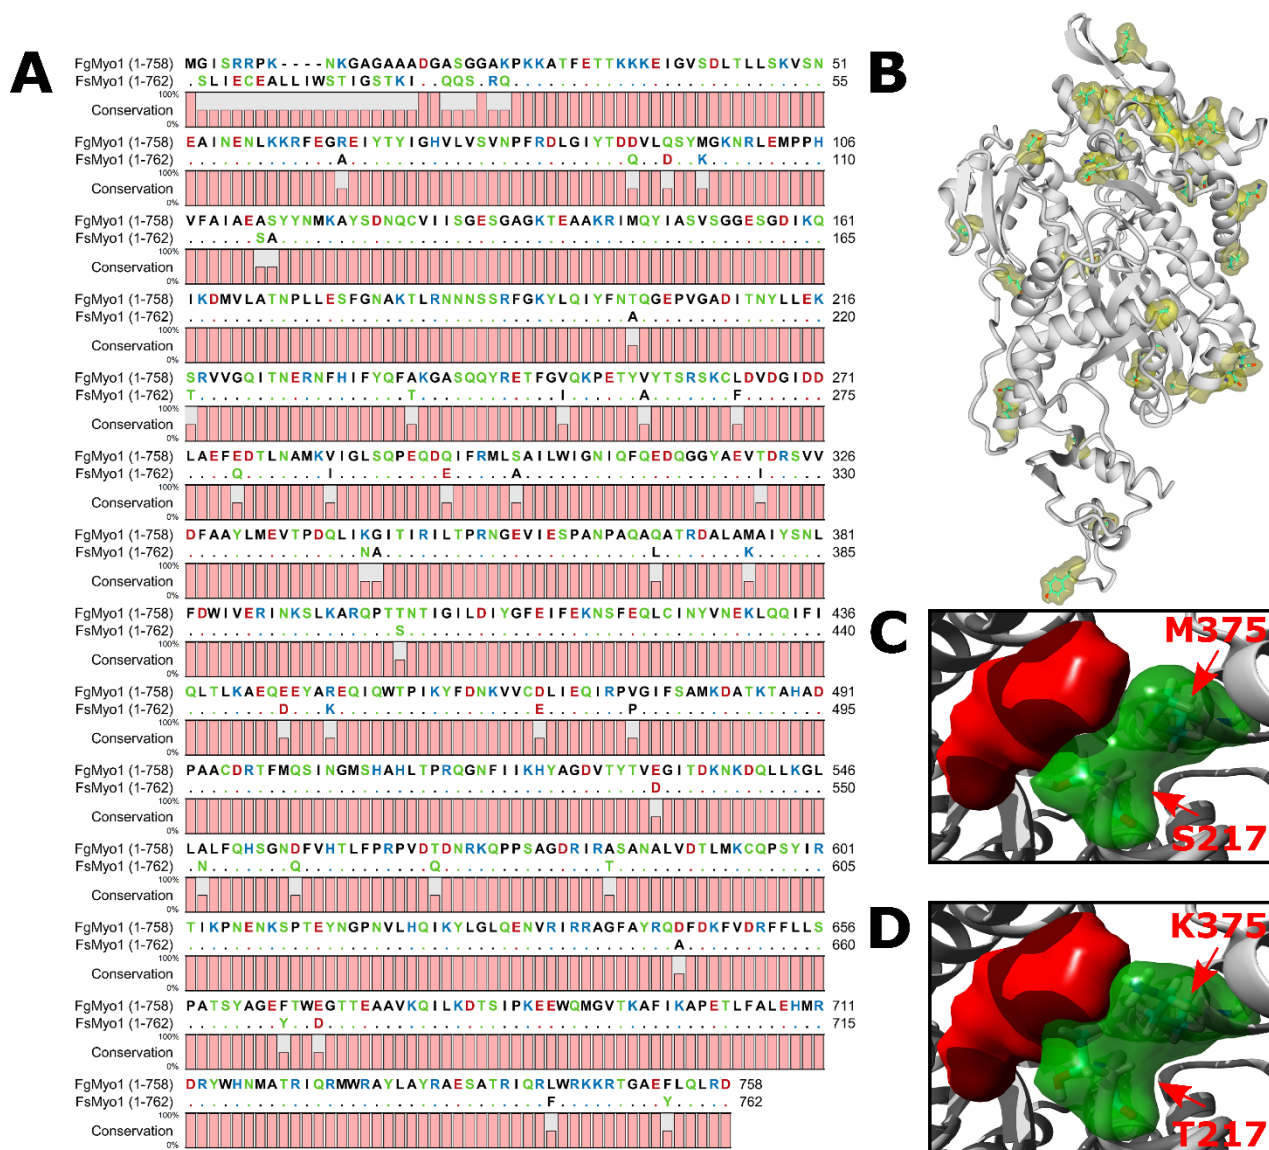

**Figure S4.** (A) Pairwise alignment of the class I myosin motor domains from *F. graminearum* PH-1 (FgMyo1), *F. solani* f. sp. *pisi* 77-14-4 (FsMyo1). Amino acids are colored by polarity, dots indicating residues that are conserved in comparison to the reference sequence of FgMyo1. (B) Pre-power stroke homology model of FsMyo1. The molecular surfaces highlighted in yellow (FsMyo1) correspond to the amino acid residues that differ from FgMyo1. (C) Surface-rendering of the Phenamacril docking-pose (red surface) and residues Met375 and S217 (green surfaces). (D) Substitutions S217T and M375K (both present in *F. solani*) in the model of FgMyo1 results in overlap of the volumes enclosed by the red (Phenamacril) and green surface areas.

Fg myosin 1 -----MGISRRPKNKGAGAAADGASGGAKPKKATFETTKK----- 35  
 Fa myosin 1 -----P-----N.V----- 35  
 Fs myosin 1 -----MSLIECEALLIWSTIGSTKI.QQS.RQ----- 39  
 Dd myosin 1E -----MIP.T----- 5  
 Dd myosin 1B -----MSKKVQ----- 6  
 Dd myosin 2 MNPIDHRTSDYHKYLVKVKQSDSLFKLTVSDK.YIWNPPDKER.SYEC.EIVSETSDSF.F.TVDGQDRQVKKDDAN 78  
 Hs myosin 1c -----MALQVELVPTGEIRVVHPPRPCKLALGSDGVRVTMESAL.AR----- 43  
 Fg myosin 1 -----KEIGVSDLTLL-SKVSNEAINEENLKKRFEGREITYYIGHVLVSNPFRDLGIYDDVLQSYMGKNRLEMPPHV 107  
 Fa myosin 1 -----A-----Q.E----- 107  
 Fs myosin 1 -----A-----Q.D.K----- 111  
 Dd myosin 1E -----AE.P.FV.-NQITEN.FI.TM.HKSDN.D.VI.T.KN.N.KESDIKAN.RYKY----- 77  
 Dd myosin 1B -----AKQ.TD.VM.-P.EDE.C.YMDF.N.P.I.N.NNSGP.FIEAR.HAQ.V----- 78  
 Dd myosin 2 QRNPI.FD.E.MSE.YLNEP.VFH.RV.YNQDL.S.LF.A.KRIP.QEMVDIFK.RR.N.VA.I 155  
 Hs myosin 1c -----DRV.Q.FV.ENFT.EA.FI.RR.RENL.P.Y.Q.SRQHMERR.VSFY.V.L 116  
 Fg myosin 1 FAIAEASYYNMKAYSNDQCVIISGESGAGKTEAAKRIMQYIASVSGGESGD-IKQIKDMVLATNPLLESFGNAKTLRN 184  
 Fa myosin 1 -----A----- 184  
 Fs myosin 1 -----SA----- 188  
 Dd myosin 1E Y.L.NDA.RS.RQSQE-----S.K.FLTF.SNQ.PN-GER.SK.L.DS.A----- 154  
 Dd myosin 1B YQL.SA.RA.NDQE-----L.G.VSAI.TEKVEYV.HVI.ES.A----- 154  
 Dd myosin 2 .SDVA.RS.LDDRQ.SLL.T-----NT.KVI.L.A.RNQANGSGVLEQQI.QA.I.A.T----- 233  
 Hs myosin 1c .V.DTV.RALRTERRD.A.M-----T.LL.FY.ETCP--APERGGAVR.RL.QS.V.A----- 192  
 Fg myosin 1 NNSSRFGKYLQIYFNTQGEIPVGADITNYLLEKSRVVGQITNERNFHIFYQFAKASQYRETFGVQ-KPETYYVTSRS 261  
 Fa myosin 1 -----Q.E----- 261  
 Fs myosin 1 -----A-----T----- 265  
 Dd myosin 1E D.MEMQ.AV.S.I.GK-----RTQG.S.ML.L.SKLNEL.LTPNAPA.E.LKK 232  
 Dd myosin 1B FE.Q.DKA.D.GK.Y-----Y.NPG.LLA.A.EKRDYVLS.S.S.Y.LNQ 231  
 Dd myosin 2 FIE.Q.SA.FIS.S.QS-----F.SET.Y.LLA.TAEKKALHLA.G.SFN.LNQ 310  
 Hs myosin 1c D.MDVQ.DFK.A.GH.LS-----H.NHG.LLE.GEEETLRLR.LERN.QS.L.LVKG 270  
 Fg myosin 1 KCLDVGIDDLAEFEDTLNAMKVIIGLSQPEQDQIFRMSALWIGNIQFQEDQGGYA-----EVTDRSVVDFAAYLME 334  
 Fa myosin 1 -----A.D-----N-----K----- 334  
 Fs myosin 1 -----F-----Q-----I-----E-----A-----I----- 338  
 Dd myosin 1E G.F.ST.SG.KIIVK.ETL.KESD.NS.W.I.A.H.T.A.AAEQRTGTTTVK.S.TKSLAA.SCLK 310  
 Dd myosin 1B Q.YT.N.VSDYAEVRQ.DT.TAQ.SD.I.IVACV.H.Y.I.DK.N-----AIY.PNALEL.SMLC 304  
 Dd myosin 2 G.V.IK.VS.SE.KI.RQ.DIV.F.E.MS.K.IIAG.HL.K.EKGA.EG-----VLK.KTALNA.STVFG 383  
 Hs myosin 1c Q.AK.SS.N.KSDWKVVRK.LT.DFTED.VEDLLSIVASV.HL.H.AANEESN-----Q.TENQLKYLTR.LS 343  
 Fg myosin 1 VTPDQLIKGITIRILTPRN-----G-----EVIESPANPAQAQATRDALAMAIYSNLFDWIVERINKSL--KARQP--T 399  
 Fa myosin 1 -----E.T-----S-----K----- 399  
 Fs myosin 1 -----NA-----L-----K----- 403  
 Dd myosin 1E TDQQS.SIALCY.SI STGV-----KRC.SV.MDCN.AYS-----K.L.ER.N.L.SK.TIINCTTEKG.--- 380  
 Dd myosin 1B IDSAT.QNA.LF.VINTGGAGGA.NRRSTYV.Q.VE.NG-----RT.DRM.S.L.V.Q.S--YYKS.---Y 377  
 Dd myosin 2 .N.SV.E.ALMEPRI LAGR-----DLVAQHL.VEKSSSS.VK.L.GR.L.L.KK.NV.C--QE.KA--- 447  
 Hs myosin 1c EGST.REAL.H.KIIAKG-----ELL.L.LE.AYA-----K.V.RT.T.L.GK.R.ASKDVES.SWRS 413  
 Fg myosin 1 TNTIGLDIYGFIEFKNSFEQLCINYNVEKQQIFIQLTLKAQEYAREQIQWTPIKY-FDNKVVCDLIEQIRPVG 476  
 Fa myosin 1 -----V----- 476  
 Fs myosin 1 S-----D.K-----E-----P----- 480  
 Dd myosin 1E -V-----V.QN.N.FC.F.L.E.S.V.G.E.KN.E.-N.PI.E.-KK.I 454  
 Dd myosin 1B Q.V-----F-----G.F.F.F.E-----V.G.K.E.N.QI-----GKS.P 454  
 Dd myosin 2 -YF.V.S-----KV-----T-----F.NHHMF.L.LK.K.N.F.DFGL.SQATI.DGRQ.P 524  
 Hs myosin 1c .TVL.L-----V.QH-----F.C-----L.E.S.EA.G.A.E.VQ.-N.II.V.-EKFK 489  
 Fg myosin 1 IFSAMKDATKTAHADPAACDRTFMQSINGMSHAHLTPR-----QGNFIIKHYAGDVYTYVEGITDKNKD 540  
 Fa myosin 1 -----S----- 540  
 Fs myosin 1 -----D----- 544  
 Dd myosin 1E LI.LLDE.CLI--AKST.Q.LD.CKQFKNPQLQSYVVSVDKDR--SIGDTC.RL-----D.R.FL 525  
 Dd myosin 1B .LLD.ICS.L.QSTGT.QK.LEKMA.IYDG.HW.GM-----T.A.A.E.EA.FS 520  
 Dd myosin 2 .LALLDEQSVF-----N.T.N.LITKL-----S.FSKKNAYEPR--FSKTE.GVT-----Q.M.EIQDWLE 590  
 Hs myosin 1c .I.LLDEECLR--PGE.T.L.LEKLEDYVKH.PHFLTTHKLADQRTKSLGR.E.RLL.E.S.T.FL.N 564  
 Fg myosin 1 QLLKGLLALFQHSGNDFVHLLFRRPVDTDNRKQPP--SAGDRIASANALVDTLMKQPSYIRTIKPNENKSPTEYN 615  
 Fa myosin 1 -----S-----Q----- 615  
 Fs myosin 1 -----N-----Q----- 619  
 Dd myosin 1E T.FGD.ISSM.S.SDPL.QG-----PTRPE.SK.R.E--T.SQF.NAM.IT.LA.S.H.V.C.S.D.QAGVID 600  
 Dd myosin 1B T.FFD.IEAI.C.KMP.LAS.NEDTGSLOK.R.T--T.FK.KT.GE.MKA.SQ.T.H.C-----T.KAKDWE 595  
 Dd myosin 2 P.QQD.ELC.KD.SDNV.TK.ND.NIASRA.KGANFITVAAQYKEQLAS.MA.ETTN.HFV.C.I.NKQL.AKLE 668  
 Hs myosin 1c L.FRN.KETMCS.K.PIMSQC.D.SELS.-K.R.E--TVATQFKM.LLQ.EIQSKE.A.V.C.DA.Q.GRFD 638  
 Fg myosin 1 GPNVLHQIKYLGLENVRIIRAGFAYRQDFDKFVDRFFLLSPAT-SYAGEFTWEGTTEAAVKQILKDTSPKKEEWQMG 692  
 Fa myosin 1 -----K-----E----- 692  
 Fs myosin 1 -----A-----Y.D----- 696  
 Dd myosin 1E EDR.R.VR.L.V.G.IEYTR.YN.YKM.CKK.WPS-----FN.AKQ.TEL.QQHN.D.IR 673  
 Dd myosin 1B NSR.K.VQ.L.V.NT.VLK.YKK.SK.WGIW--K.DAIEGC.T.FQ.MNLEAGQ.L 671  
 Dd myosin 2 DKV.D.LRCN.VL.GI.T.K.PN.IIYAD.K.YY.A.NV-PR--DAEDSQK.TDAV.HLN.DP.QYRF 740  
 Hs myosin 1c EVLIR.V.L.L.V.RKYEA.LQ.YKS.C.E.WPT--A.RPQDG.AVLVRHLGYKP.YK 711  
 Fg myosin 1 VTKAFIKAPETLFALEHMRDRYWHNMATRIRMWRAYLAYR-----AESATRIQR-----LWR 745  
 Fa myosin 1 -----F----- 745  
 Fs myosin 1 -----F----- 749  
 Dd myosin 1E K.V.RN.T.YF.EK.ELEMPRIV.L.KT.G.R.RSKWNQ-RKA.IK.L-----FY 730  
 Dd myosin 1B K.V.RH.V.L.EAL.KKDFDCTAK.KAF.N-----EAL.KKDFDCTAK.KAF.N-----K 709  
 Dd myosin 2 I.I.FR.GQ.ARI.EA.EQRISEI.KA.AAT.GWI.RKVYKQAR.HTVAARIQQNLRAYIDFKSWPW.K 812  
 Hs myosin 1c R.I.RF.K.T.DALEVRRQSL.K.AA.GFHWKQFLRVKR.IC.S-----W 769

**Figure S5.** Multiple sequence alignment of the motor domain constructs used in this study. Fg: *Fusarium graminearum*, Fa: *F. avenaceum*, Fs: *F. solani*, Dd: *Dictyostelium discoideum*, Hs: *Homo sapiens*. Positions of amino acid residues implicated in mutation-induced Phenamacril-resistance in *F. graminearum* are shown in red boxes. Amino acids substitutions are highlighted as red dots.
